# Supplementary material for: Generation, functional analysis and applications of isogenic three-dimensional self-aggregating cardiac microtissues from human pluripotent stem cells
Source: Springer Nature journal article supplement (doi:10.1038/s41596-021-00497-2), 2021-03-26
Supplement: MOESM3 [file 41596_2021_497_MOESM3_ESM24.xlsx]

## Sheet: Size_variability table_raw data
Supplementary Table 1: Raw data about morphological, contraction and single-cell electrophysiological parameters measured in LUMC0099iCTRL04 and LUMC0020iCTRL06 hiPSC lines, relative to Table 3.
Size (µm)	line	Batch
497.424	LUMC0099iCTRL04	1
421.286	LUMC0099iCTRL04	1
464.594	LUMC0099iCTRL04	1
445.085	LUMC0099iCTRL04	1
533.069	LUMC0099iCTRL04	1
502.153	LUMC0099iCTRL04	1
443.276	LUMC0099iCTRL04	1
488.154	LUMC0099iCTRL04	1
487.976	LUMC0099iCTRL04	1
433.451	LUMC0099iCTRL04	1
434.126	LUMC0099iCTRL04	2
389.017	LUMC0099iCTRL04	2
384.484	LUMC0099iCTRL04	2
390.311	LUMC0099iCTRL04	2
412.046	LUMC0099iCTRL04	2
406.951	LUMC0099iCTRL04	2
421.404	LUMC0099iCTRL04	2
374.481	LUMC0099iCTRL04	2
427.355	LUMC0099iCTRL04	2
411.938	LUMC0099iCTRL04	2
478.649	LUMC0020iCTRL06	1
560.609	LUMC0020iCTRL06	1
475.346	LUMC0020iCTRL06	1
559.32	LUMC0020iCTRL06	1
471.628	LUMC0020iCTRL06	1
597.681	LUMC0020iCTRL06	1
444.715	LUMC0020iCTRL06	1
497.406	LUMC0020iCTRL06	1
441.117	LUMC0020iCTRL06	1
470.201	LUMC0020iCTRL06	2
500.072	LUMC0020iCTRL06	2
518.584	LUMC0020iCTRL06	2
492.142	LUMC0020iCTRL06	2
444.381	LUMC0020iCTRL06	2
457.555	LUMC0020iCTRL06	2
537.036	LUMC0020iCTRL06	2
514.106	LUMC0020iCTRL06	2
505.66	LUMC0020iCTRL06	2
559.528	LUMC0020iCTRL06	2
515.501	LUMC0020iCTRL06	3
408.407	LUMC0020iCTRL06	3
473.367	LUMC0020iCTRL06	3
501.756	LUMC0020iCTRL06	3
458.38	LUMC0020iCTRL06	3
484.088	LUMC0020iCTRL06	3
560.049	LUMC0020iCTRL06	3
536.941	LUMC0020iCTRL06	3
495.305	LUMC0020iCTRL06	3
461.6	LUMC0020iCTRL06	3
533.225	LUMC0020iCTRL06	4
555.289	LUMC0020iCTRL06	4
489.843	LUMC0020iCTRL06	4
530.24	LUMC0020iCTRL06	4
544.314	LUMC0020iCTRL06	4
529.74	LUMC0020iCTRL06	4
436.926	LUMC0020iCTRL06	4
583.531	LUMC0020iCTRL06	4
536.32	LUMC0020iCTRL06	4
511.865	LUMC0020iCTRL06	4

## Sheet: Sarcomeres_variability table_ra
Supplementary Table 1: Raw data about morphological, contraction and single-cell electrophysiological parameters measured in LUMC0099iCTRL04 and LUMC0020iCTRL06 hiPSC lines, relative to Table 3.
Length	Sarcomere organization	Line	Batch
1.76627	0.0325	LUMC0099iCTRL04	1
1.82197	0.0202	LUMC0099iCTRL04	1
1.71177	0.0251	LUMC0099iCTRL04	1
1.77721	0.0257	LUMC0099iCTRL04	1
1.70387	0.0201	LUMC0099iCTRL04	1
1.8493	0.0239	LUMC0099iCTRL04	1
1.79996	0.0295	LUMC0099iCTRL04	2
1.72571	0.0258	LUMC0099iCTRL04	2
1.71559	0.0302	LUMC0099iCTRL04	2
1.8046	0.0267	LUMC0099iCTRL04	2
1.85153	0.029	LUMC0099iCTRL04	2
1.82202	0.0292	LUMC0099iCTRL04	2
1.78806	0.0277	LUMC0020iCTRL06	1
1.86773	0.0295	LUMC0020iCTRL06	1
1.7759	0.0246	LUMC0020iCTRL06	1
1.88645	0.0284	LUMC0020iCTRL06	1
1.76914	0.0302	LUMC0020iCTRL06	1
1.85049	0.027	LUMC0020iCTRL06	1
1.7682	0.0321	LUMC0020iCTRL06	2
1.85919	0.0281	LUMC0020iCTRL06	2
1.83602	0.028	LUMC0020iCTRL06	2
1.79645	0.0275	LUMC0020iCTRL06	2
1.71358	0.0237	LUMC0020iCTRL06	2
1.80201	0.028	LUMC0020iCTRL06	2
1.73432	0.0359261	LUMC0020iCTRL06	3
1.79903	0.0181654	LUMC0020iCTRL06	3
1.84224	0.0278698	LUMC0020iCTRL06	3
1.72824	0.0341902	LUMC0020iCTRL06	3
1.7176	0.0163805	LUMC0020iCTRL06	3
1.767	0.0220278	LUMC0020iCTRL06	3
1.7936	0.0234735	LUMC0020iCTRL06	3
1.82617	0.0364316	LUMC0020iCTRL06	3
1.78904	0.0305177	LUMC0020iCTRL06	3
1.79778	0.0236184	LUMC0020iCTRL06	3
1.76798	0.0177278	LUMC0020iCTRL06	3
1.80435	0.0321196	LUMC0020iCTRL06	3
1.72902	0.028677	LUMC0020iCTRL06	4
1.65133	0.0242429	LUMC0020iCTRL06	4
1.81005	0.0257464	LUMC0020iCTRL06	4
1.6507	0.022537	LUMC0020iCTRL06	4
1.84687	0.0299842	LUMC0020iCTRL06	4
1.70801	0.0219302	LUMC0020iCTRL06	4
1.88862	0.0241163	LUMC0020iCTRL06	4
1.73092	0.0240368	LUMC0020iCTRL06	4
1.69455	0.0283491	LUMC0020iCTRL06	4
1.78707	0.0208804	LUMC0020iCTRL06	4
1.72113	0.0237945	LUMC0020iCTRL06	4
1.7884		LUMC0020iCTRL06	4
1.62989		LUMC0020iCTRL06	4
1.69478		LUMC0020iCTRL06	4

## Sheet: Contraction_variability table_
Supplementary Table 1: Raw data about morphological, contraction and single-cell electrophysiological parameters measured in LUMC0099iCTRL04 and LUMC0020iCTRL06 hiPSC lines, relative to Table 3.
normalized Contraction duration	IBI (ms)	line	Batch
292.97	2862.86	LUMC0099iCTRL04	1
392.78	2372.5	LUMC0099iCTRL04	1
453.2	1325	LUMC0099iCTRL04	1
243.12	4062	LUMC0099iCTRL04	1
472.88	3450	LUMC0099iCTRL04	1
228.31	5108	LUMC0099iCTRL04	1
442.79	1372.5	LUMC0099iCTRL04	1
586.6	1465	LUMC0099iCTRL04	1
273.42	4245	LUMC0099iCTRL04	1
495.08	3517.86	LUMC0020iCTRL06	1
675.91	2614.29	LUMC0020iCTRL06	1
841.22	2883.93	LUMC0020iCTRL06	1
623.18	2163.69	LUMC0020iCTRL06	1
436.32	2580.36	LUMC0020iCTRL06	1
461.34	2642.86	LUMC0020iCTRL06	1
526.63	2566.96	LUMC0020iCTRL06	1
604.17	2012.76	LUMC0020iCTRL06	1
540.99	2669.64	LUMC0020iCTRL06	1
630.75	3303.57	LUMC0020iCTRL06	1
730.24	2401.79	LUMC0020iCTRL06	1
403.9	2116.88	LUMC0020iCTRL06	1
617.24	2578.12	LUMC0020iCTRL06	1
615.47	3023.81	LUMC0020iCTRL06	1
567.97	2900.3	LUMC0020iCTRL06	1
539.14	3081.63	LUMC0020iCTRL06	1
381.33	7125	LUMC0020iCTRL06	2
353.95	6491.07	LUMC0020iCTRL06	2
534.13	5321.43	LUMC0020iCTRL06	2
866.96	4214.29	LUMC0020iCTRL06	2
382.05	5571.43	LUMC0020iCTRL06	2
399.45	6839.29	LUMC0020iCTRL06	2
398.85	5845.24	LUMC0020iCTRL06	2
350.71	5973.21	LUMC0020iCTRL06	2
687.07	1367.86	LUMC0020iCTRL06	2
324.62	4922.62	LUMC0020iCTRL06	3
484.68	6276.79	LUMC0020iCTRL06	3
424.81	5741.07	LUMC0020iCTRL06	3
589.56	6473.21	LUMC0020iCTRL06	3
547.36	6255.95	LUMC0020iCTRL06	3
553.33	2903.57	LUMC0020iCTRL06	3
508.39	5988.1	LUMC0020iCTRL06	3
626.22	6513.39	LUMC0020iCTRL06	3
339.87	6098.21	LUMC0020iCTRL06	3
377.98	5250	LUMC0020iCTRL06	3
389.28	4848.21	LUMC0020iCTRL06	3
413.67	5636.9	LUMC0020iCTRL06	3
627.38	4886.9	LUMC0020iCTRL06	3
487.28	5330.36	LUMC0020iCTRL06	3
712.25	6160.71	LUMC0020iCTRL06	3
398.73	2821.43	LUMC0020iCTRL06	4
370.59	3400.51	LUMC0020iCTRL06	4
223.29	2615.08	LUMC0020iCTRL06	4
263.92	3160.71	LUMC0020iCTRL06	4
339.4	2587.66	LUMC0020iCTRL06	5
238.61	2530.84	LUMC0020iCTRL06	5
244.78	2563.78	LUMC0020iCTRL06	5
187.63	2855.16	LUMC0020iCTRL06	5
271.01	2240.26	LUMC0020iCTRL06	5
222.12	3148.81	LUMC0020iCTRL06	5
520.45	2510.42	LUMC0020iCTRL06	5
207.83	3834.18	LUMC0020iCTRL06	5
307.53	2766.07	LUMC0020iCTRL06	5
170.01	3182.54	LUMC0020iCTRL06	5
207.56	3071.43	LUMC0020iCTRL06	5
189.61	3437.5	LUMC0020iCTRL06	5
218.18	4068.88	LUMC0020iCTRL06	5
325.26	2948.98	LUMC0020iCTRL06	5
231.33	2673.7	LUMC0020iCTRL06	5
284.08	2222.53	LUMC0020iCTRL06	5
185.84	3299.11	LUMC0020iCTRL06	5
201.63	2801.79	LUMC0020iCTRL06	5
226.85	3325.89	LUMC0020iCTRL06	5
166.21	3212.3	LUMC0020iCTRL06	5
359.62	1896.21	LUMC0020iCTRL06	5
440.27	2452.38	LUMC0020iCTRL06	6
177.19	3202.38	LUMC0020iCTRL06	6
396.71	3206.63	LUMC0020iCTRL06	6
136.49	2797.62	LUMC0020iCTRL06	6
210.37	2589.29	LUMC0020iCTRL06	6
169.09	3327.38	LUMC0020iCTRL06	6

## Sheet: EP_variability table_raw data
Supplementary Table 1: Raw data about morphological, contraction and single-cell electrophysiological parameters measured in LUMC0099iCTRL04 and LUMC0020iCTRL06 hiPSC lines, relative to Table 3.
APA	Vmax	Resting	APD90	line	Batch
84.9995	21.624	-62.5011	209.992	LUMC0020iCTRL06	1
102.108	64.4838	-68.5346	174.568	LUMC0020iCTRL06	1
98.2711	NA	-67.3574	244.893	LUMC0020iCTRL06	1
107.077	75.7981	-72.1811	168.454	LUMC0020iCTRL06	2
119.175	66.1321	-73.6313	287.522	LUMC0020iCTRL06	2
82.7191	24.5972	-63.6046	137.101	LUMC0020iCTRL06	2
83.5707	23.407	-58.4784	145.138	LUMC0020iCTRL06	2
113.414	51.8491	-84.2993	348.107	LUMC0020iCTRL06	2
101.768	42.114	-67.8686	238.006	LUMC0020iCTRL06	2
120.112	109.062	-76.2249	222.086	LUMC0020iCTRL06	3
107.894	32.4403	-75.2593	390.272	LUMC0020iCTRL06	3
102.429	59.0815	-77.3642	181.383	LUMC0020iCTRL06	3
102.693	153.37	-68.9343	126.151	LUMC0020iCTRL06	3
104.707	85.6524	-75.5551	216.199	LUMC0020iCTRL06	4
93.9629	21.1182	-66.8402	275.413	LUMC0020iCTRL06	4
100.501	23.3155	-64.5853	270.736	LUMC0020iCTRL06	5
116.332	58.7642	-76.435	205.627	LUMC0020iCTRL06	5
93.0888	71.4122	-72.1196	127.987	LUMC0020iCTRL06	5
109.779	63.2629	-71.3505	276.221	LUMC0020iCTRL06	5
113.786	19.38	-81.899	389.3	LUMC0099iCTRL04	1
84.397	20.88	-57.675	119.64	LUMC0099iCTRL04	1
98.231	19.02	-70.789	313.65	LUMC0099iCTRL04	1
95.029	14.72	-73.1	229.285	LUMC0099iCTRL04	1
88.718	18.44	-58.021	199.315	LUMC0099iCTRL04	1
99.509	29.92	-78.846	290.795	LUMC0099iCTRL04	1
111.738	130	-79.94	225.91	LUMC0099iCTRL04	1
92.988	18.34	-65.625	300.545	LUMC0099iCTRL04	1
122.915	99.1	-75.458	492.81	LUMC0099iCTRL04	1
111.668	81.94	-77.734	243.33	LUMC0099iCTRL04	1
94.7178	22.5556	-67.2878	266.622	LUMC0099iCTRL04	1
106.671	32.18	-82.32	317.945	LUMC0099iCTRL04	1
100.474	36.5556	-81.2033	427.022	LUMC0099iCTRL04	1
97.1657	23.7143	-68.4729	303.229	LUMC0099iCTRL04	2
88.22	26.66	-60.593	207.58	LUMC0099iCTRL04	2
98.216	63.46	-57.865	135.175	LUMC0099iCTRL04	2
123.244	63.08	-81.135	397.19	LUMC0099iCTRL04	2
109.968	38.84	-67.754	643.8	LUMC0099iCTRL04	2
117.08	38.42	-90.545	590.315	LUMC0099iCTRL04	2
122.773	23.2	-76.313	389.595	LUMC0099iCTRL04	2
94.765	51.12	-63.893	248.32	LUMC0099iCTRL04	2
